# Supplementary material
Source: PubMed Central journal article supplement (PMC9877201)
Supplement: NIHMS1863615-supplement-Supplementary_Material.pdf [file NIHMS1863615-supplement-Supplementary_Material.pdf]

---

# Induction of T-helper-17-cell-mediated anti-tumour immunity by pathogen-mimicking polymer nanoparticles

---

In the format provided by the authors and unedited

---

## Supplementary figures

**Supplementary Fig. 1** | The hydrodynamic size and surface charge.

**Supplementary Fig. 2** | Cellular uptake of Mann-NC by BMDCs.

**Supplementary Fig. 3** | Intracellular cytokine levels of CD4 T cells.

**Supplementary Fig. 4** | Frequencies of G-MDSCs and M-MDSCs in TME.

**Supplementary Fig. 5** | CD4 T cells frequency and their PD-1 expression levels in TME.

**Supplementary Fig. 6** | Gating strategy of Representative scatter plots for the frequencies of IL17+CD4+ Th17 cells and Foxp3+CD4+ Tregs.

**Supplementary Fig. 7** | Dectin-2 and TLR-4 expression on DCs, macrophages, and monocytes.

**Supplementary Fig. 8** | IL-17A expression among CD8 T cells in TME.

**Supplementary Fig. 9** |  $\alpha$ PD-1 effect on average tumour growth curve of mice with Mann-NC injection.

**Supplementary Fig. 10** | Frequency of IFN- $\gamma$  +CD4+ T-cells and IL-4+ CD4+ T-cells in TME.

**Supplementary Fig. 11** | Schematic of therapeutic regimen and average tumour growth curve of LPS + OX40 combination.

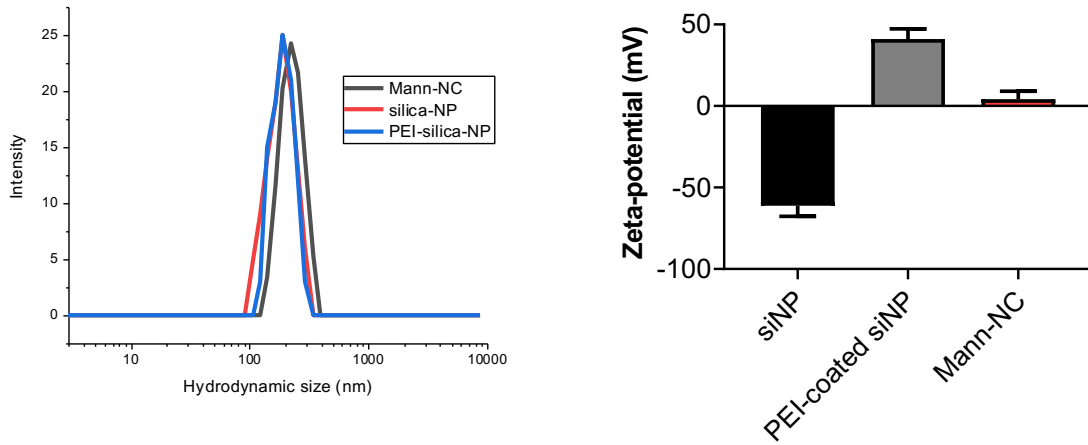

**Supplementary Fig. 1** | The hydrodynamic size (left) and surface charge (right) of Mann-NC, silica-NP, and PEG-silica-NP.

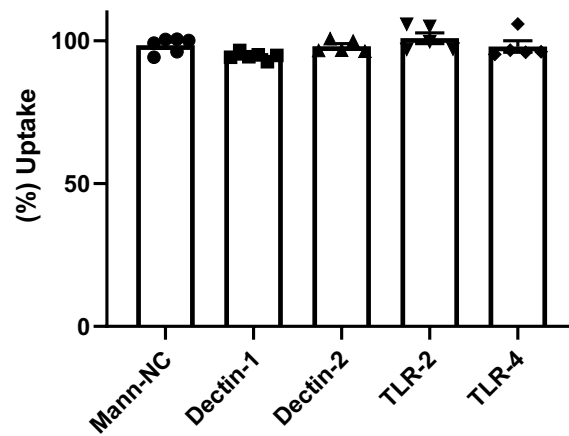

**Supplementary Fig. 2** | Cellular uptake of Mann-NC by BMDCs was measured after 1 hr of co-incubation with antibodies against Dectin-1, Dectin-2, TLR-2, or TLR-4.

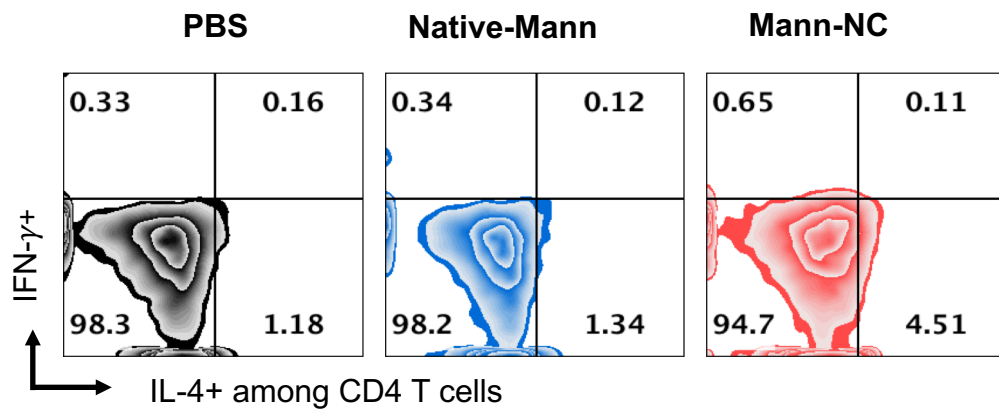

**Supplementary Fig. 3 | Intracellular cytokine levels of CD4 T cells.** Shown are the representative scatter plots of IFN- $\gamma$ + and IL4+ CD4+ T cells. Conditioned media from BMDCs incubated with Mann-NC or Native-Mann for 12 hr were added to naïve CD4+ T cells from LNs and spleen. After 5 days of culture, intracellular cytokine analysis was performed by incubating CD4+ T cells with PMA, ionomycin, and brefeldin A for 4 hr.

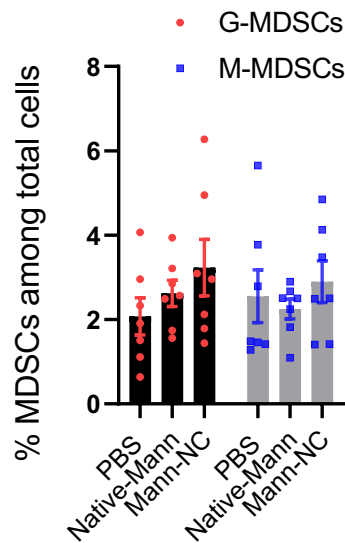

**Supplementary Fig. 4 |** CT26 tumour-bearing mice were treated as in **Fig. 3a**, and the frequencies of G-MDSCs and M-MDSCs in TME were measured on day 15.

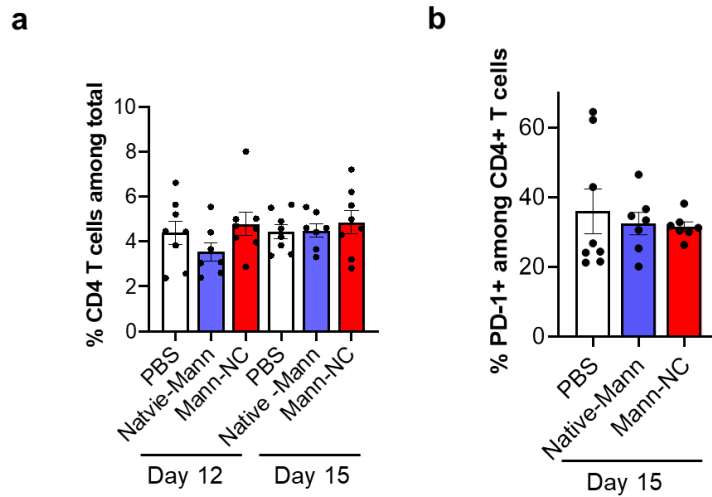

**Supplementary Fig. 5 | CD4 T cells frequency and their PD-1 expression levels in TME.** BALB/c mice were inoculated subcutaneously with  $1.5 \times 10^5$  CT26 cells on day 0 and treated by intratumoural administration of Mann-NC on days 9, 12, and 15. (a) CD4 T-cells frequency and (b) PD-1 expression level among CD4 T cells.

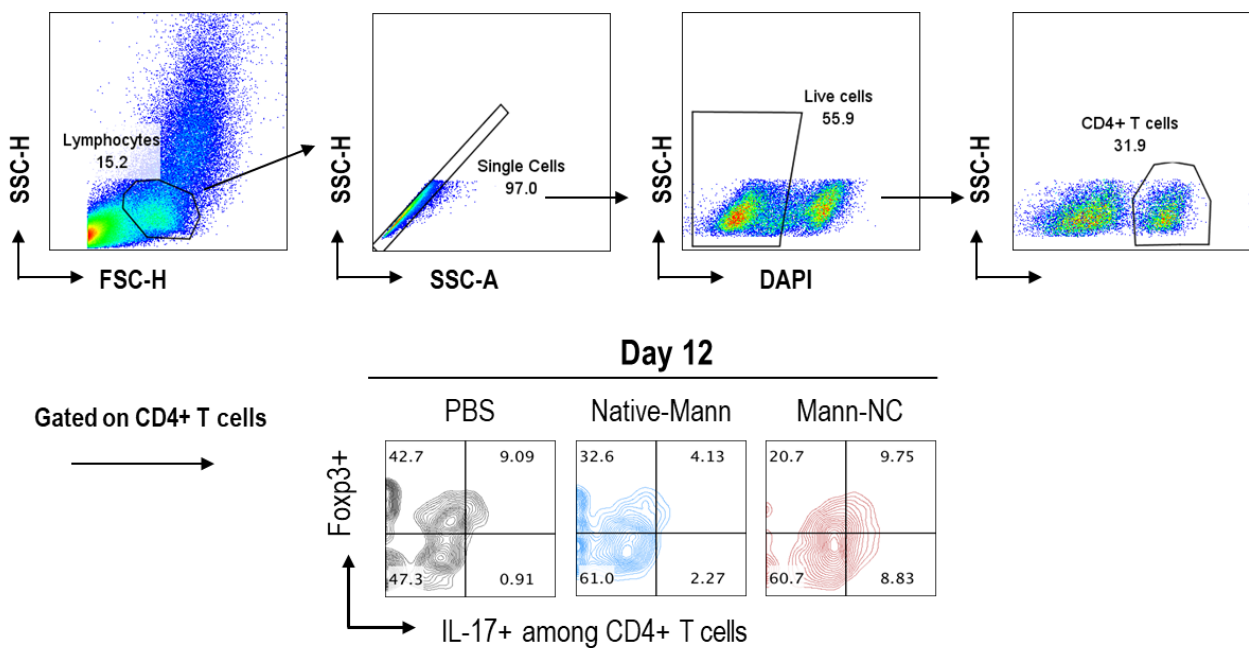

**Supplementary Fig. 6 | Gating strategy of Representative scatter plots for the frequencies of IL17+CD4+ Th17 cells and Foxp3+CD4+ Tregs within TME in Fig. 3i-k.**

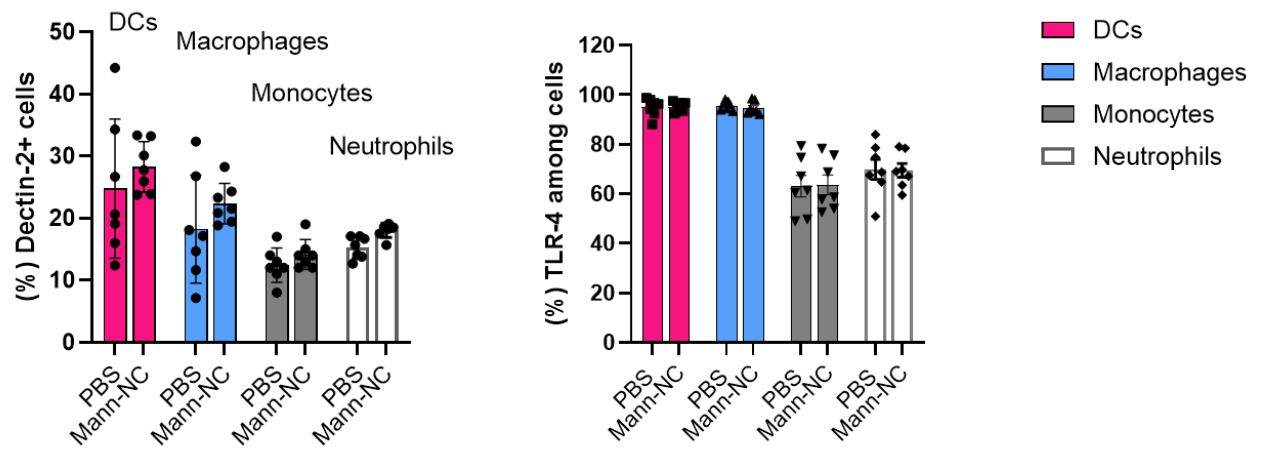

**Supplementary Fig. 7** | Mann-NC was administered intratumourally as in **Fig. 4a**, and after 24 hr, intratumoural DCs, macrophages, and monocytes were assessed for the expression of Dectin-2 and TLR-4.

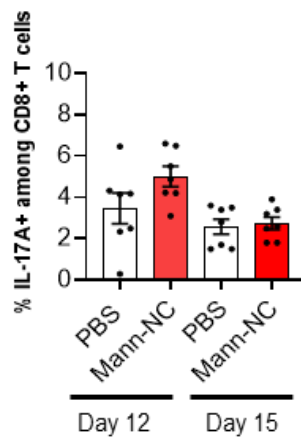

**Supplementary Fig. 8** | CT26 tumour-bearing mice were treated with Mann-NC as in **Fig. 4a**, and CD8+ T-cells in the TME on days 12 and 15 were analysed for the expression of IL-17A.

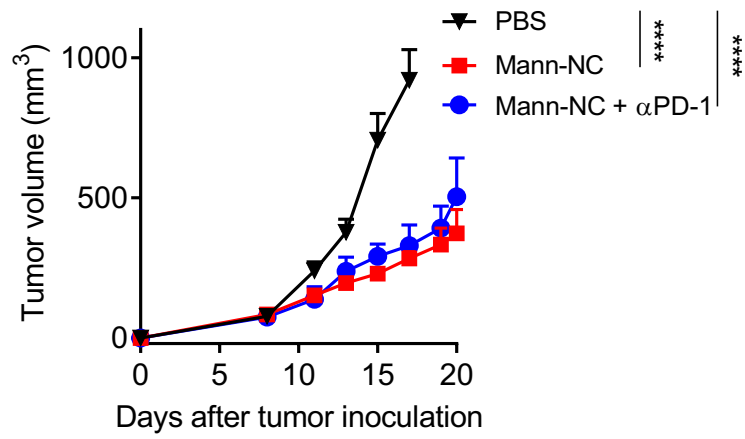

**Supplementary Fig. 9** | CT26 tumour-bearing BALB/c mice were treated with Mann-NC or Mann-NC + aPD-1 as in **Fig. 8a**, followed by tumour monitoring.

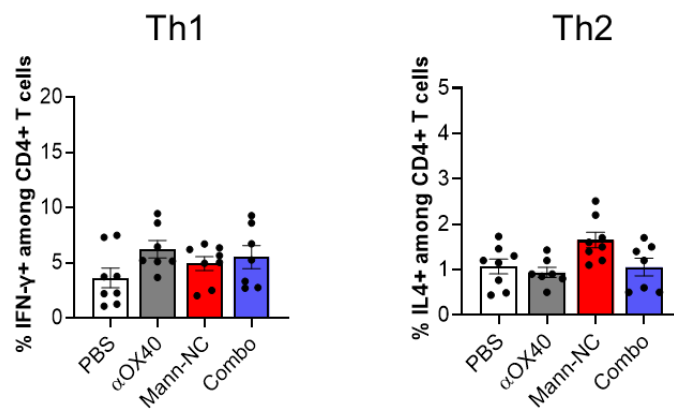

**Supplementary Fig. 10** | CT26 tumour-bearing mice were treated as in **Fig. 8a**, and the frequency of IFN-γ +CD4+ T-cells and IL-4+ CD4+ T-cells were measured in the TME on day 15.

### CT-26 tumor

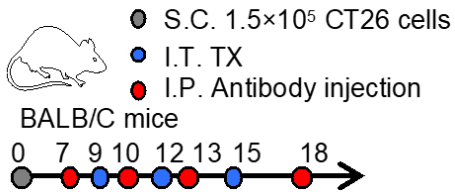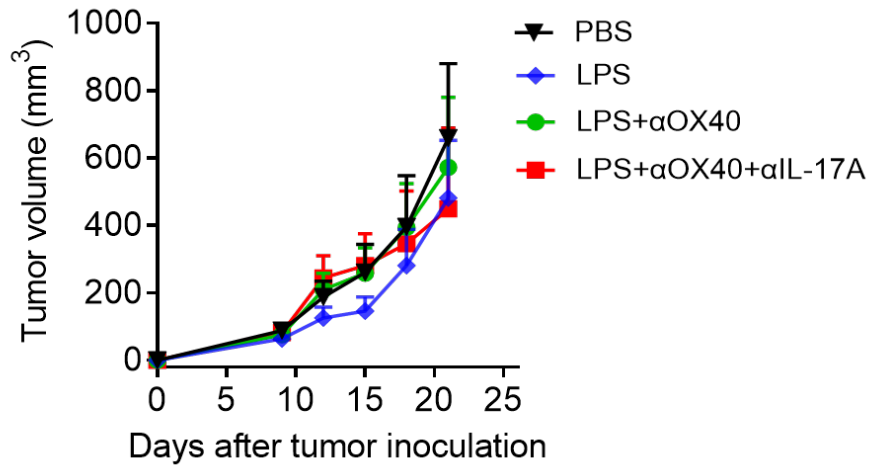

**Supplementary Fig. 11** | Schematic of therapeutic regimen and average tumour growth curve. BALB/c mice were inoculated SC with  $1.5 \times 10^5$  CT26 cells on day 0. On days 9, 12, and 15, tumour-bearing mice were treated intratumorally with LPS,  $\alpha$ OX40, and/or  $\alpha$ IL-17A (200 ng, 100  $\mu$ g, and 100  $\mu$ g doses, respectively).
